# Supplementary material
Source: MDPI journal article supplement (https://www.mdpi.com/2073-4441/15/6/1171)
Supplement: s1 [file s1]

Table S1 Summary of quadratic model

| Fit Statistics | R <sup>2</sup> | Adj<br>R <sup>2</sup> | Pred<br>R <sup>2</sup> | Adeq<br>Precision | C.V. % | Std.<br>Dev. | Mean  |
|----------------|----------------|-----------------------|------------------------|-------------------|--------|--------------|-------|
|                | 0.98           | 0.97                  | 0.86                   | 28.76             | 2.02   | 1.60         | 79.35 |

Table S2 The experimental results are verified under optimized conditions

| Test conditions       | A        | B        | C     | B              |
|-----------------------|----------|----------|-------|----------------|
|                       | NaOH/ILL | Tep (°C) | T (h) | Removal rate % |
| Optimum conditions    | 1.18     | 185.154  | 2.76  | 95.15          |
| Adjustment conditions | 1.2      | 185      | 2.7   | 94.5           |

Table S3.Parameters of kinetic models predicting the experimental data for Pb(II) and Cu(II)

|        | $q_{e,exp}(mg/g)$ | Pseudo-first-order kinetic model |                 |        |          | Pseudo-second-order kinetic model |                                |        |          |
|--------|-------------------|----------------------------------|-----------------|--------|----------|-----------------------------------|--------------------------------|--------|----------|
|        |                   | $q_{e,cal}(mg/g)$                | $K_1(min^{-1})$ | $R^2$  | $\chi^2$ | $q_{e,cal}(mg/g)$                 | $K_2(10^{-3}g/(mg \cdot min))$ | $R^2$  | $\chi^2$ |
| Pb(II) | 279.74            | 271.14                           | 0.5543          | 0.8971 | 2.9965   | 281.10                            | 0.00361                        | 0.9985 | 0.0292   |
| Cu(II) | 51.60             | 48.96                            | 03217           | 0.9723 | 2.6469   | 51.80                             | 0.00793                        | 0.9986 | 0.4696   |
